# Supplementary material for: The orphan receptor GPR55 drives skin carcinogenesis and is upregulated in human squamous cell carcinomas
Source: Springer Nature journal article supplement (doi:10.1038/onc.2012.278), 2012-07-02
Supplement: 41388_2013_BFonc2012278_MOESM36_ESM.pdf [file 41388_2013_BFonc2012278_MOESM36_ESM.pdf]

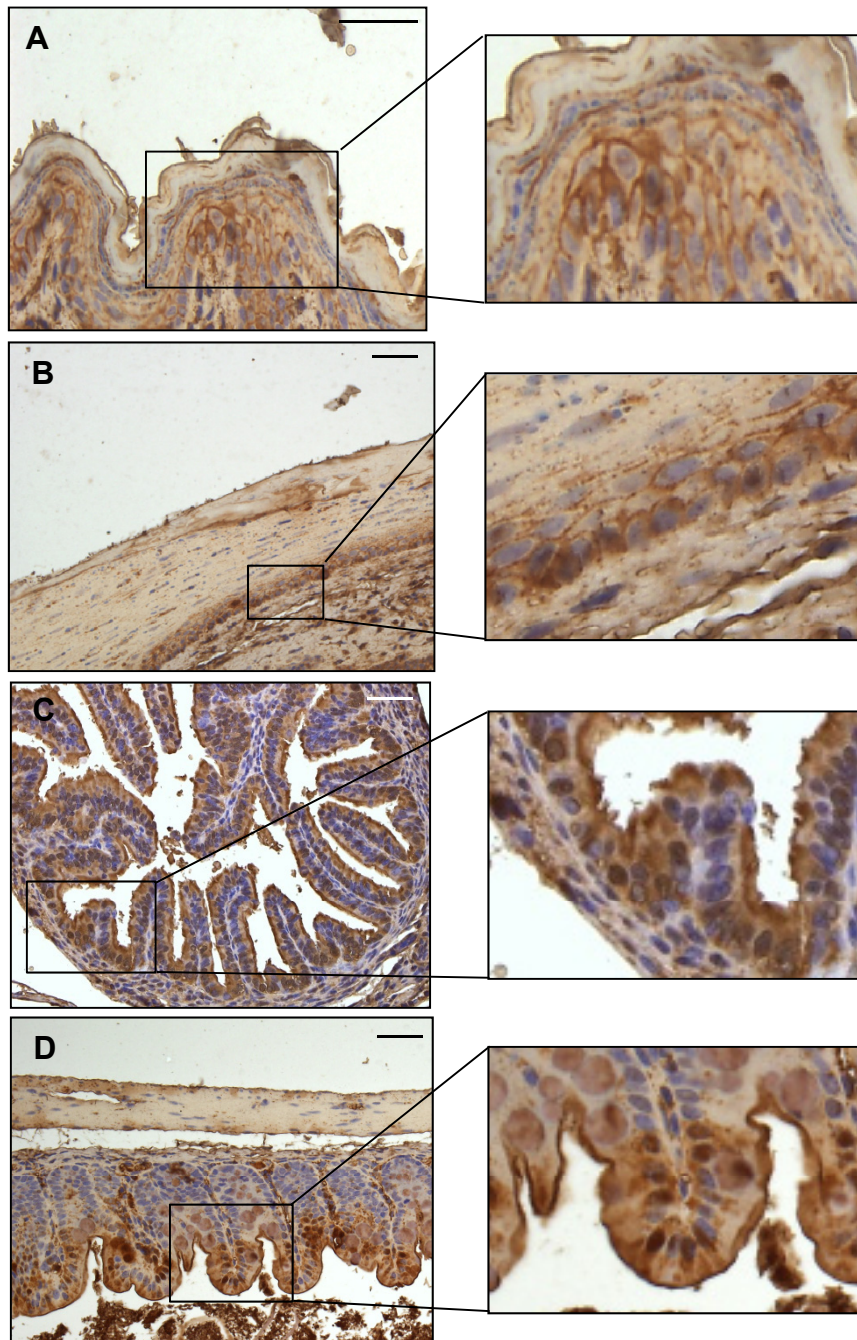

**Supplementary Fig. S1 Expression of GPR55 in mouse stratified epithelia.** Immunohistochemical analysis of GPR55 in mouse skin (A), oral cavity (B), esophagus (C) and stomach (D). Right images represent magnifications of the selected areas. GPR55 appears in brown and cell nuclei in blue. Scale bars, 200  $\mu\text{m}$ .
