# Supplementary material for: The orphan receptor GPR55 drives skin carcinogenesis and is upregulated in human squamous cell carcinomas
Source: Springer Nature journal article supplement (doi:10.1038/onc.2012.278), 2012-07-02
Supplement: 41388_2013_BFonc2012278_MOESM38_ESM.pdf [file 41388_2013_BFonc2012278_MOESM38_ESM.pdf]

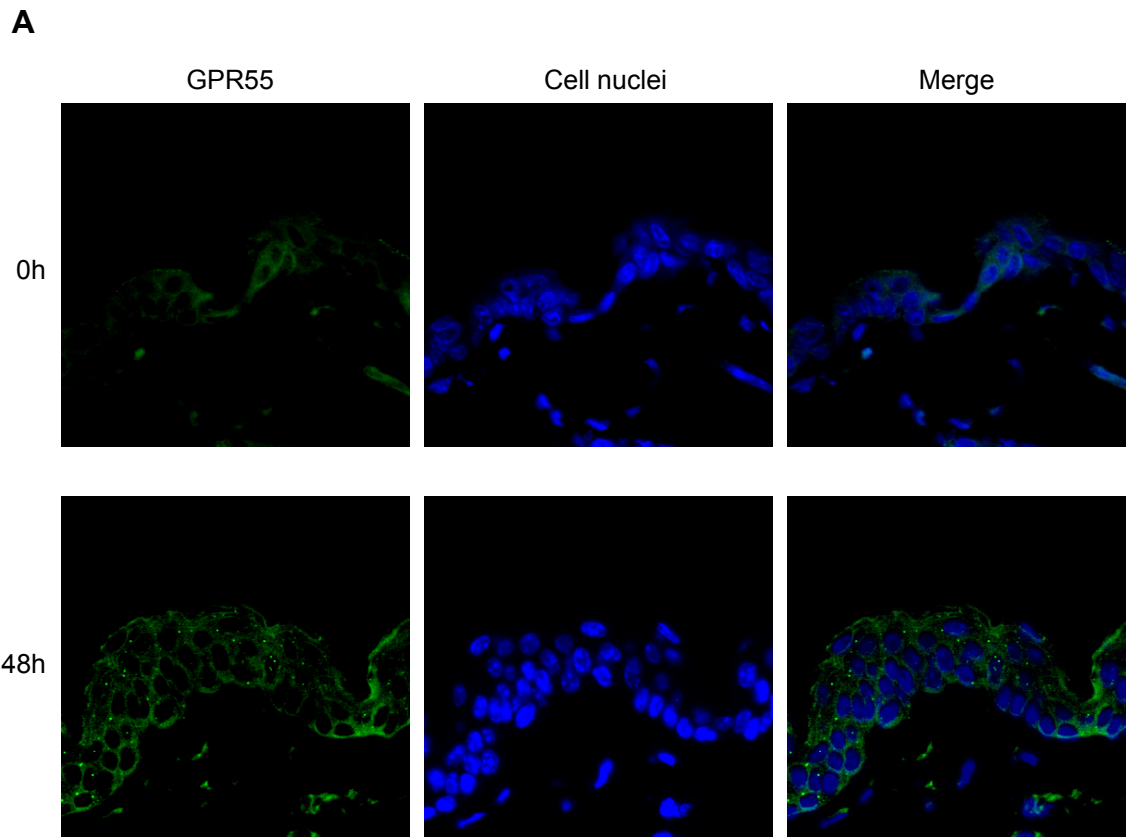

**Supplementary Fig. S3 GPR55 is upregulated upon TPA-treatment.** Wild type mice were treated topically with a single TPA application. GPR55 expression in the skin was analyzed by immunofluorescence at the indicated times.
