# Supplementary material for: The orphan receptor GPR55 drives skin carcinogenesis and is upregulated in human squamous cell carcinomas
Source: Springer Nature journal article supplement (doi:10.1038/onc.2012.278), 2012-07-02
Supplement: 41388_2013_BFonc2012278_MOESM39_ESM.pdf [file 41388_2013_BFonc2012278_MOESM39_ESM.pdf]

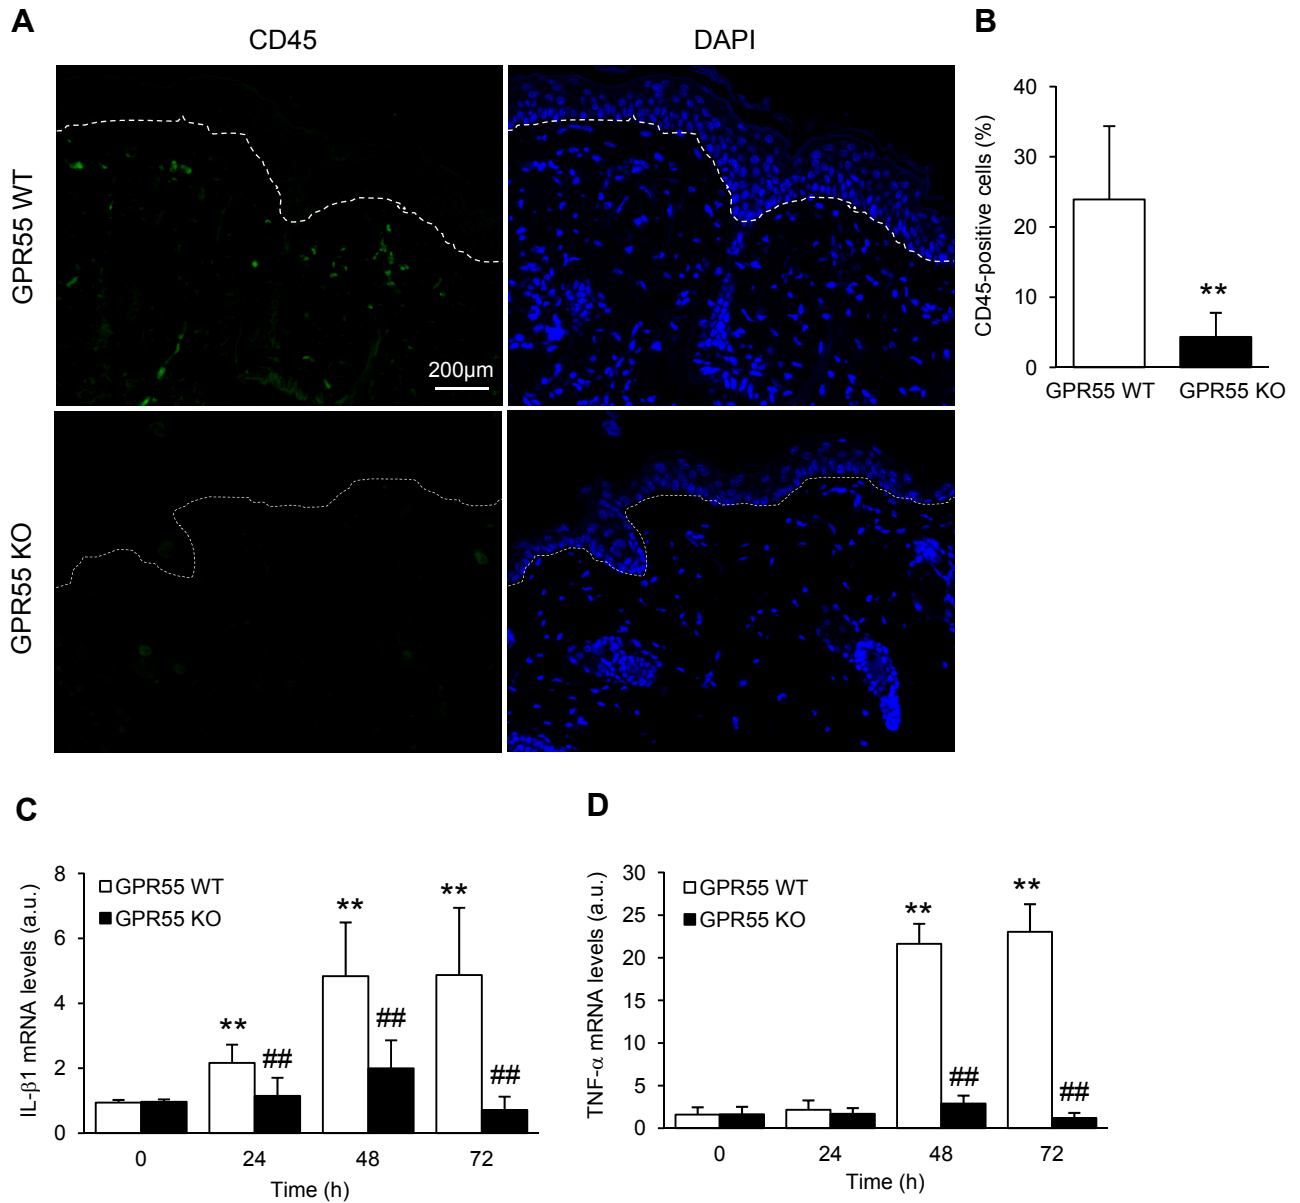

**Supplementary Fig. S4 GPR55 mediates TPA-induced dermal inflammation.** Wt and GPR55 KO mice received a single topical application of the tumor promoter TPA. Immunofluorescence analysis (A) and quantification (B) of CD45-positive (green) cells (differentiated hematopoietic cells except erythrocytes and platelets) 72 h after TPA application. Cell nuclei are in blue. Results are expressed as % vs total cells per field. C and D, Real-time quantitative PCR analysis of IL-β1 (C) and TNF-α (D) mRNA, in the skin of wt and KO mice at the indicated times after TPA application. Results are expressed in arbitrary units. \*\*,  $p < 0,01$  vs  $t_0$  (time of TPA application); ##,  $p < 0,01$  vs the corresponding group of wt mice.
