# Supplementary material for: The orphan receptor GPR55 drives skin carcinogenesis and is upregulated in human squamous cell carcinomas
Source: Springer Nature journal article supplement (doi:10.1038/onc.2012.278), 2012-07-02
Supplement: 41388_2013_BFonc2012278_MOESM40_ESM.pdf [file 41388_2013_BFonc2012278_MOESM40_ESM.pdf]

**Supplementary Table S1.** Primers used for reverse-transcriptase (RT) and real-time quantitative (RTQ) PCR

| <b>RT-PCR primers</b> | <b>Sense</b>                    | <b>Antisense</b>                |
|-----------------------|---------------------------------|---------------------------------|
| mGPR55                | 5'-GTGGTCTCCTTTCTCCCAGTG-3'     | 5'-TTAGCCCCTGGAGACCATGGTATCC-3' |
| mc-Fos                | 5'-AGCATGGGCTCTCCTGTCAA-3'      | 5'-GGGCTGCCAAAATAAACTCC-3'      |
| GAPDH                 | 5'-GGGAAGCTCACTGGCATGGCCTTCC-3' | 5'-CATGTGGGCCATGAGGTCCACCAC-3'  |

  

| <b>RTQ-PCR primers</b> | <b>Sense</b>                     | <b>Antisense</b>               |
|------------------------|----------------------------------|--------------------------------|
| hGPR55                 | 5'-CTGCCTTGGTTCCACCATA-3'        | 5'-CCAGGATGCAGGTGAGTAAGA-3'    |
| mGPR55                 | 5'-TGGCCAGGCATCTTCAGT-3'         | 5'-CCAAGAGAAGTCCCCTTTCC-3'     |
| mIL1 $\beta$           | 5'-TGTAATGAAAGACGGCACACC-3'      | 5'-TCTTCTTTGGGTATTGCTTGG-3'    |
| mTNF $\alpha$          | 5'-TGCCTATGTCTCAGCCTCTTC-3'      | 5'-GAGGCCATTTGGGAACCTTCT-3'    |
| 18S                    | 5'-GCTCTAGAATTACCACAGTTATCCAA-3' | 5'-AAATCAGTTATGGTTCCTTTGGTC-3' |
